# Supplementary material
Source: PubMed Central journal article supplement (PMC3807232)
Supplement: embor2013131s2.pdf [file embor2013131s2.pdf]

Manuscript EMBOR-2013-37656

**CATP is a critical component of the Neurospora circadian clock by regulating the nucleosome occupancy rhythm at the frequency locus**

Joonseok Cha, Mian Zhou and Yi Liu

*Corresponding author: Yi Liu, University of Texas Southwestern Medical Center*

---

**Review timeline:**

Submission date:

19 June 2013

Accepted:

31 July 2013

---

**Transaction Report:**

No Peer Review Process File is available with this article, as the authors have chosen not to make the review process public in this case.
